# Supplementary material for: Automatic pulmonary artery-vein separation in CT images using a twin-pipe network and topology reconstruction
Source: PeerJ journal article supplement (doi:10.7717/peerj-cs.1537), 2023-10-03
Supplement: code.zip [file code.zip]

## Sheet: Sheet1
video	blurpingjun	floatingjun	ringpingjun	blockpingjun	bleedpingjun	flickerpingjun	MOS
1	2.03395e-05	0.0515354	0.00782507	0.189245	0.07255	0.277004	8.63636
2	0.0597213	0.172137	0.0549673	0.803409	0.368559	0.493589	7.86364
3	0.0080706	0.0107187	0.00110311	0.128151	0.0354639	0.186661	8.04545
4	0.0140586	0.023531	0.00232662	0.257962	0.0667676	0.233329	7.68182
5	0.000224256	0.0461456	0.0256646	0.0465452	0.0270434	0.223232	8.54545
6	0.0684449	0.0455224	0.0184971	0.48169	0.327562	0.105488	4.90909
9	0.0349249	0.0465888	0.00294406	0.581888	0.159463	0.238318	3.5
10	0.086822	0.190966	0.172382	0.981439	0.465562	0.740457	5.5
11	0.138217	0.186218	0.0823772	0.929474	0.642415	0.246234	5.95455
12	0.0416101	0.0961145	0.0788579	0.513185	0.235274	0.468698	3.22727
13	0.182713	0.145419	0.0802373	0.81075	0.597556	0.172731	3.22727
14	0.123418	0.170314	0.0919564	0.852298	0.52661	0.275466	3.5
16	0.00713406	0.105264	0.101457	0.873017	0.254957	0.811404	7.63636
17	4.50349e-05	0.095213	0.0152046	0.360312	0.139277	0.295387	6.18182
18	0.0502233	0.158672	0.139682	0.970598	0.357645	0.759044	6.77273
19	0.0835892	0.231495	0.0856748	0.69468	0.329019	0.397997	8.54545
20	0.186891	0.383186	0.13022	0.939314	0.559161	0.47304	3.36364
21	0.0604198	0.174284	0.0597574	0.824773	0.383757	0.51157	7.5
23	0.0298174	0.125914	0.110267	0.938801	0.281703	0.739571	8.13636
24	0.0120498	0.141121	0.148611	0.918847	0.344501	0.8252	7.95455
25	0.0302704	0.205552	0.0179616	0.720674	0.416441	0.258472	6.5
27	0.17881	0.396677	0.123182	0.944554	0.511478	0.496761	1.5
28	0.00701861	0.0901098	0.0385431	0.643142	0.145012	0.388661	7.72727
29	0.0131018	0.0220945	0.0015439	0.332858	0.0686556	0.185789	7.31818
30	0.0273225	0.231671	0.0192843	0.772282	0.376896	0.207304	3.18182
31	0.00496988	0.167267	0.0430121	0.840806	0.342474	0.451938	5.90909
34	0.0130366	0.212626	0.0117506	0.651165	0.272013	0.20741	6.77273
35	0.0604198	0.174284	0.0597574	0.824773	0.383757	0.51157	6.59091
36	0.00496652	0.00954366	0.00096375	0.103566	0.0346819	0.133062	8.5
37	0.0103572	0.0596557	0.015962	0.302006	0.183855	0.221188	8.59091
38	0.00445859	0.0690375	0.0244355	0.519618	0.0982596	0.314357	7.68182
39	0.157419	0.206796	0.109634	0.933447	0.670727	0.21547	4.72727
41	0.0681134	0.187169	0.0636365	0.834096	0.400377	0.527907	6.18182
42	0.110429	0.274445	0.101546	0.821572	0.407606	0.447053	6.13636
45	0.0563526	0.116036	0.0500529	0.51786	0.231244	0.466682	3.81818
46	0.132895	0.26253	0.0980977	0.923937	0.517683	0.601769	3.27273
47	0.151935	0.333873	0.120983	0.912796	0.500858	0.475993	4.22727
48	0.0152334	0.0550275	0.0439061	0.853405	0.199805	0.35438	8.04545
49	0.100035	0.18469	0.0771836	0.854927	0.490849	0.279911	2.95455
50	0.0121626	0.065038	0.0236568	0.339142	0.200713	0.237998	6.27273
52	0.0232939	0.229145	0.0183544	0.756523	0.37702	0.212508	6.22727
53	0.11766	0.101693	0.03671	0.675787	0.466381	0.139875	5.09091
54	0.0114134	0.017414	0.00136301	0.250515	0.0507431	0.147707	2.45455
55	0.0997386	0.144854	0.00370268	0.0521996	0.0955192	0.168555	3.36364
56	0.0619336	0.267779	0.0314538	0.815281	0.479312	0.232165	1.45455
57	0.0667171	0.296974	0.0367613	0.559459	0.417254	0.344379	5
58	0.0106738	0.0466556	0.0302249	0.774524	0.170445	0.329563	8.18182
59	0.0714372	0.111846	0.051314	0.753336	0.404128	0.230699	7.45455
60	0.00888219	0.171223	0.0466366	0.827147	0.348658	0.436174	0.954545
61	0.0503827	0.118094	0.0600585	0.494075	0.223382	0.476318	1.45455
62	0.0367108	0.0856544	0.0681222	0.489995	0.220811	0.475078	0.909091
63	0.0724443	0.108733	0.0859926	0.576643	0.286147	0.498756	1.5
64	0.000200311	0.094644	0.0308465	0.539325	0.222642	0.331754	3.54545
65	8.73066e-05	0.0831806	0.014745	0.317462	0.125319	0.295748	7
66	0.109237	0.247489	0.0836001	0.909827	0.477756	0.574702	5.77273
68	0.0282723	0.285727	0.0450253	0.894929	0.363135	0.334076	6.22727
69	0.00547023	0.154192	0.0304676	0.732783	0.271374	0.398778	3.86364
70	0.0828326	0.128759	0.075319	0.684513	0.320687	0.506932	2.36364
71	0.00616453	0.0804202	0.0340286	0.611952	0.123555	0.359619	7.81818
72	0.0819886	0.182286	0.176557	0.982999	0.468463	0.771999	4
73	0.0101414	0.0446946	0.0261149	0.748219	0.164826	0.313972	8.81818
74	0.0226734	0.14697	0.0982119	0.894485	0.282836	0.640631	0.727273
75	0.00904697	0.054836	0.0128294	0.280084	0.17587	0.202651	7.63636
76	3.15975e-05	0.0584523	0.00852579	0.207605	0.0774156	0.262197	7.95455
77	0.0365153	0.283652	0.0505449	0.913348	0.453409	0.296745	4.36364
78	0.019713	0.0335146	0.00435006	0.492828	0.105297	0.267769	2.90909
79	0.0242591	0.18416	0.014008	0.645239	0.35296	0.245466	7.72727
80	0.000275839	0.103661	0.0291253	0.60939	0.230061	0.358967	3.63636
81	0.082016	0.120499	0.0549128	0.769168	0.429675	0.235122	8
82	0.0566977	0.151119	0.00682268	0.076634	0.106684	0.193625	4.90909
83	0.0509337	0.0917454	0.0423463	0.677869	0.308746	0.278111	6.86364
85	0.00883135	0.0722848	0.0502142	0.260025	0.132337	0.397631	5.81818
88	0.000765254	0.0554814	0.0560932	0.0671705	0.0339061	0.280668	4.95455
89	0.027723	0.18967	0.0150276	0.680803	0.384096	0.255949	7.27273
92	0.00333619	0.0590403	0.0216127	0.482859	0.079754	0.281302	5.95455
95	0.037998	0.0867561	0.0797068	0.926608	0.311655	0.381786	6.22727
96	0.0225227	0.118005	0.101381	0.92583	0.258876	0.75275	6.72727
98	0.000374875	0.0432536	0.0340366	0.0465382	0.0348079	0.238959	7.09091
100	0.000172462	0.0433939	0.021405	0.0409474	0.0253007	0.214198	7.63636
101	0.107417	0.0746291	0.0331603	0.626877	0.418038	0.133078	2.45455
105	0.0584177	0.165849	0.0518551	0.794816	0.365308	0.505486	3
106	0.00716705	0.0137832	0.00100432	0.117971	0.0337736	0.131154	7.63636
108	0.149091	0.216069	0.0887756	0.936856	0.647151	0.26457	6.81818
110	0.0207052	0.0461924	0.00625856	0.557958	0.131321	0.3095	5.09091
111	0.0141038	0.116568	0.067083	0.805575	0.219805	0.532259	5.59091
112	0.0078926	0.0377773	0.0214299	0.718688	0.139151	0.297422	7
113	0.176612	0.225145	0.109554	0.951452	0.709069	0.266648	1.54545
114	0.0112507	0.0995559	0.0554056	0.753746	0.181801	0.458238	7.09091
115	0.0991327	0.152828	0.0686575	0.838329	0.502199	0.23715	3.72727
116	0.103751	0.272511	0.0965365	0.796626	0.382059	0.427984	7
118	0.0269382	0.198747	0.212063	0.949348	0.460487	0.830266	7.22727
119	0.0088784	0.0536962	0.0101727	0.217057	0.164024	0.201463	8.40909
120	0.0419363	0.213648	0.0200345	0.741997	0.462884	0.266402	5.77273
121	0.0281844	0.115999	0.0348273	0.64264	0.273058	0.424471	6.36364
122	0.0226075	0.142666	0.0927545	0.87682	0.275454	0.617319	3.5
126	0.000217782	0.0454958	0.0280402	0.0419878	0.0284644	0.223323	7.5
127	1.48985e-05	0.0454774	0.0071861	0.167887	0.0623872	0.220806	6.81818
128	0.00402257	0.0675987	0.0289033	0.145504	0.0915889	0.384081	7.90909
129	0.0155673	0.0625083	0.019041	0.317703	0.186751	0.213683	4.5
131	0.122429	0.181936	0.0803125	0.911241	0.575042	0.225578	4.90909
132	0.14852	0.32029	0.111915	0.883734	0.46602	0.462367	4.95455
133	0.0801684	0.17026	0.00456649	0.0694137	0.100134	0.185979	4.59091
135	2.29826e-05	0.0685478	0.0131248	0.311678	0.09861	0.234351	2.63636
136	0.000205144	0.0461554	0.0281636	0.04276	0.0277587	0.223471	5.04545
137	0.00841549	0.0546861	0.0106079	0.252	0.170627	0.201896	6.63636
138	0.00372412	0.145477	0.0234892	0.66376	0.214541	0.383745	7.13636
140	0.0133382	0.0496567	0.0379595	0.835586	0.186538	0.332505	3.95455
141	0.00300024	0.0677271	0.0253327	0.130736	0.0862064	0.363552	7.31818
142	0.0174361	0.216153	0.0153136	0.733739	0.320195	0.210299	8.18182
143	0.0552262	0.0992417	0.0443085	0.69147	0.328508	0.280659	7.80303
145	0.0489239	0.114392	0.0458432	0.466502	0.213508	0.461643	8.40909
146	0.000206987	0.0453771	0.0234282	0.0402946	0.0257356	0.216403	7.04545
147	0.062017	0.232253	0.034782	0.790327	0.510352	0.276111	1.22727
148	0.0053323	0.073882	0.0324702	0.604879	0.117353	0.333577	4.04545
149	0.040993	0.152195	0.13188	0.972698	0.347921	0.788962	5.22727
150	0.0464868	0.266259	0.0271861	0.806126	0.44425	0.215561	1.36364
151	0.0220053	0.0634341	0.0547677	0.871514	0.241283	0.372219	7.77273
152	0.0937469	0.126018	0.00354151	0.0449798	0.0902195	0.163627	5.36364
153	0.11471	0.16228	0.0791181	0.857825	0.52328	0.241578	6.95455
154	0.115134	0.161842	0.0915478	0.855587	0.515135	0.286098	4.18182
155	0.0755093	0.217847	0.0448032	0.8074	0.568096	0.293348	3.18182
156	0.0380943	0.0424943	0.00435073	0.681759	0.204412	0.309504	2.90909
157	0.00906511	0.0517956	0.0106108	0.236845	0.170476	0.210056	7.22727
158	0.0758406	0.128805	0.0594844	0.766289	0.38922	0.291392	7.09091
159	0.0392917	0.136008	0.0428541	0.716711	0.317659	0.453542	7.95455
160	0.0941519	0.250112	0.0926755	0.759399	0.351588	0.422376	4.77273
162	0.0229394	0.220878	0.0152418	0.738811	0.342129	0.214964	8.40909
163	0.0480126	0.252195	0.012061	0.218725	0.156731	0.26382	4.54545
164	0.000200468	0.0440977	0.0288381	0.0477758	0.0285998	0.228452	7.54545
165	0.0403624	0.0736282	0.0346647	0.58484	0.270829	0.250493	6.09091
166	0.00194943	0.0601321	0.0221995	0.101206	0.0702053	0.350938	5.97727
167	0.0093214	0.160211	0.0459863	0.826703	0.354639	0.430002	7
168	0.195127	0.249915	0.119959	0.954533	0.722354	0.26838	5.18182
171	0.120979	0.244804	0.0835926	0.907061	0.48139	0.593284	1.04545
172	0.130817	0.179646	0.0772677	0.915344	0.625699	0.239188	7.36364
173	0.0915612	0.0581056	0.0278613	0.546323	0.376378	0.116436	8.04545
175	0.0750893	0.20936	0.0789374	0.636718	0.297598	0.383182	5.86364
176	0.0364246	0.202387	0.0171103	0.716275	0.404776	0.257807	3.09091
177	0.0727596	0.145043	0.0577215	0.806168	0.400561	0.285326	4.95455
178	0.0485244	0.210403	0.0357538	0.77052	0.498688	0.29975	3.45455
179	2.58976e-05	0.0858547	0.0143897	0.353766	0.12447	0.268342	5.81818
180	0.015827	0.026503	0.00260323	0.306031	0.0771456	0.257946	8.27273
183	0.0216587	0.135326	0.0947935	0.892726	0.285549	0.632086	2
184	0.000249164	0.048331	0.0373247	0.0468197	0.0290091	0.234846	2.40909
185	0.00921469	0.0819715	0.0451577	0.266489	0.126274	0.41944	4.40909
186	0.0114843	0.0179055	0.00184689	0.239385	0.0551243	0.211036	5.27273
187	0.0063229	0.0101265	0.000878328	0.121434	0.0356181	0.139453	8.04545
188	0.00301707	0.0686514	0.0292417	0.129203	0.0823209	0.387618	7.22727
191	0.0393902	0.299731	0.0530032	0.913895	0.472327	0.277301	6.95455
193	0.175483	0.222107	0.112534	0.953584	0.712429	0.206881	2.86364
194	0.0131333	0.0227696	0.0017873	0.350261	0.084588	0.195638	6.36364
195	0.0368515	0.244075	0.0234458	0.775945	0.418483	0.223528	6.09091
196	0.0218345	0.179563	0.0111383	0.598767	0.320288	0.242082	8.54545
197	0.000719896	0.045403	0.0525914	0.0625449	0.0323426	0.270826	4.81818
198	0.0149915	0.0690443	0.0228582	0.324442	0.191355	0.225791	5.95455
199	0.0742249	0.100143	0.0516403	0.68316	0.388308	0.219263	8.59091
201	0.00858568	0.0547466	0.012244	0.274881	0.177355	0.209283	7.45455
202	0.0166415	0.145357	0.0264737	0.887654	0.335663	0.342259	6.86364
205	0.00426118	0.138123	0.0240883	0.684041	0.239119	0.387697	7.63636
206	3.87317e-05	0.0950735	0.0245908	0.542543	0.201915	0.315441	5.43182
207	0.0345292	0.284018	0.0488523	0.90385	0.423496	0.297717	7.36364
209	0.00548992	0.0825143	0.0359863	0.639804	0.135844	0.360275	7.95455
210	0.119671	0.176542	0.0725107	0.911021	0.606092	0.236028	8.63636
211	0.0321027	0.0739219	0.0723893	0.926123	0.281084	0.375829	1.40909
212	0.00970024	0.126435	0.016533	0.825938	0.288034	0.317667	7.86364
213	0.00956444	0.0561444	0.0163783	0.302369	0.185104	0.223073	7.86364
214	0.159173	0.119718	0.0590648	0.788245	0.562189	0.177782	0.818182
215	0.0105322	0.0139013	0.00134901	0.155764	0.0450737	0.208309	8.68182
216	0.00809186	0.0542729	0.0128299	0.281469	0.183691	0.207014	5.45455
217	0.10965	0.153398	0.0864221	0.84849	0.509504	0.283395	0.727273
218	0.13338	0.305659	0.109094	0.869424	0.43329	0.461759	2.04545
219	0.155084	0.196762	0.105814	0.93419	0.679311	0.220408	1.12121
220	0.141478	0.103878	0.0479766	0.709312	0.498474	0.157964	5.90909
221	0.0807691	0.228506	0.0871969	0.706419	0.342085	0.406229	7.54545
222	0.0630118	0.125657	0.057733	0.548012	0.260907	0.473355	8.04545
223	0.0866382	0.147833	0.0670674	0.824883	0.443466	0.290046	6.22727
224	0.00576574	0.0666623	0.034825	0.202402	0.1041	0.403423	3.5
225	0.0114841	0.0215551	0.000942563	0.270394	0.0688624	0.170496	7.59091
226	0.0140241	0.0560194	0.0173228	0.316158	0.190032	0.218241	7.36364
227	0.0330666	0.166905	0.0490154	0.938195	0.405652	0.39046	3.86364
228	0.0257607	0.187578	0.0133788	0.644407	0.352507	0.247672	4.72727
229	0.000794494	0.0451661	0.0514527	0.0653104	0.0369122	0.267857	1.36364
230	0.00946273	0.0569484	0.0120835	0.269364	0.177372	0.20285	6.95455
231	0.0827057	0.0567911	0.0225949	0.536211	0.364011	0.115284	7.5
232	0.0265886	0.2045	0.209095	0.954156	0.445411	0.829054	1.95455
233	0.0361854	0.128898	0.0407654	0.702677	0.305005	0.439365	7.95455
234	0.144831	0.229754	0.0909698	0.936478	0.647167	0.2126	3.5
235	9.40803e-05	0.0781525	0.023492	0.531262	0.161552	0.245594	0.681818
236	0.0187093	0.216576	0.0159564	0.717531	0.32074	0.206803	4.90909
239	0.00590451	0.143371	0.0345125	0.770574	0.307691	0.429072	7.72727
240	0.102715	0.155107	0.0899713	0.713125	0.364646	0.531416	4.04545
241	0.0036428	0.14321	0.0214743	0.609882	0.191249	0.364098	5.22727
245	0.000209036	0.0479429	0.0320581	0.0484199	0.0319157	0.229532	7.18182
246	0.0279151	0.168217	0.052022	0.934317	0.387372	0.405957	1.68182
247	0.212822	0.270992	0.124213	0.96133	0.745352	0.284598	3.40909
248	2.84911e-05	0.0504748	0.0085975	0.197946	0.0734649	0.256163	8.18182
249	0.0398842	0.197645	0.0576265	0.943273	0.43311	0.391339	0.590909
250	0.0674919	0.129937	0.0639935	0.590944	0.278036	0.487326	6.68182
251	0.0217312	0.041756	0.00389301	0.456539	0.116531	0.278055	6.63636
254	0.0324975	0.0361421	0.0026266	0.613431	0.135337	0.229336	1.04545
255	0.205186	0.170438	0.0820901	0.836062	0.627286	0.190301	2.22727
256	0.00919741	0.0143207	0.00127012	0.161791	0.0441318	0.208138	8.31818
257	0.13047	0.315031	0.111445	0.886861	0.429467	0.466401	5
258	0.00993767	0.014678	0.00144109	0.172472	0.0473405	0.216997	8.54545
259	0.0989691	0.0607867	0.027392	0.559387	0.387648	0.121528	7.63636
260	0.0428651	0.317729	0.0525533	0.922117	0.499545	0.282332	5.18182
261	0.0081057	0.12467	0.0155383	0.798929	0.274052	0.308353	6.68182
262	0.00816422	0.109096	0.10931	0.878904	0.271164	0.815615	8.81818
263	0.0469872	0.216335	0.0197773	0.277817	0.251088	0.266779	6.09091
265	0.00457506	0.00542149	0.000738621	0.0771502	0.0242927	0.106605	6.31818
266	0.0403791	0.303156	0.0530715	0.927012	0.492274	0.286537	1.59091
268	0.00978504	0.102143	0.059489	0.797449	0.200429	0.47692	4.86364
269	0.00879622	0.0536832	0.0111572	0.259562	0.17006	0.202557	6.59091
270	0.0225863	0.0344937	0.00315254	0.622287	0.16214	0.291521	2.90909
271	0.0133037	0.133749	0.0212653	0.867101	0.313227	0.328108	5.09091
272	0.10301	0.181595	0.0718193	0.898304	0.53459	0.225374	6.36364
273	0.208275	0.404779	0.145636	0.957031	0.609032	0.475911	1.22727
275	0.168214	0.16094	0.0571553	0.796358	0.569825	0.180699	2.45455
276	0.160307	0.209384	0.0957565	0.936504	0.668992	0.253524	7.63636
277	0.00578827	0.147605	0.0311171	0.744606	0.283695	0.404982	8.18182
279	0.0280363	0.0752194	0.0748677	0.922734	0.280219	0.392252	3.77273
280	0.0111105	0.1358	0.139316	0.92154	0.3266	0.826978	5.22727
282	0.0350933	0.26588	0.0222834	0.800725	0.427061	0.237922	3
283	0.0360974	0.17247	0.117779	0.891962	0.324432	0.680855	1.59091
284	0.0101181	0.161378	0.0512784	0.856931	0.388693	0.450836	6.68182
285	0.127501	0.0858454	0.0466436	0.685959	0.479321	0.140555	7.18182
286	0.0134188	0.145295	0.0235519	0.875739	0.303522	0.319363	7.45455
287	0.0942334	0.256971	0.0965181	0.791808	0.373576	0.430883	7
288	0.0476007	0.111701	0.0438159	0.450095	0.209462	0.452105	8.77273
290	0.0100108	0.0441793	0.0257774	0.761188	0.153676	0.319949	8.72727
291	0.00971988	0.0997817	0.0562731	0.767791	0.183796	0.456391	2.09091
293	0.0184344	0.0615381	0.0443954	0.846357	0.218409	0.343202	8.13636
295	0.0573575	0.194119	0.072538	0.94608	0.456796	0.418606	1.09091
296	0.0223761	0.156837	0.0330363	0.911471	0.361152	0.355171	2.86364
297	0.000266816	0.0435004	0.0459483	0.0606579	0.031225	0.249692	5.68182
298	0.182665	0.273513	0.10706	0.954854	0.690384	0.295048	3.90909
299	0.0265824	0.0528871	0.00625752	0.593046	0.15595	0.338866	5.86364
300	0.0505008	0.093147	0.0952003	0.934703	0.354058	0.418108	5.13636
302	0.0129963	0.0223986	0.0023301	0.2904	0.0694246	0.245371	7.59091
303	0.0182813	0.168542	0.0102064	0.543389	0.286448	0.239207	6.13636
306	0.0601882	0.0888957	0.0435377	0.650362	0.359502	0.209816	6.54545
307	0.12726	0.176494	0.0751836	0.909584	0.613556	0.234111	8.09091
308	0.0498015	0.0816964	0.0414449	0.609491	0.289834	0.263739	8.31818
309	0.115645	0.235268	0.0906137	0.906448	0.482967	0.583886	3.81818
310	0.0689801	0.123114	0.0548946	0.758808	0.382265	0.28016	2.90909
311	0.0176879	0.148631	0.0403275	0.924942	0.360447	0.358512	5.04545
313	0.0854965	0.142319	0.0851923	0.675104	0.338177	0.497215	5.31818
314	0.0040712	0.150207	0.0293605	0.744702	0.27492	0.416099	7.13636
316	0.0135621	0.0804387	0.0426198	0.305596	0.146289	0.428811	5.22727
317	0.168575	0.221203	0.0982641	0.943646	0.685416	0.264529	6.90909
318	0.0354701	0.130455	0.0395383	0.68721	0.302312	0.437731	8.90909
320	0.039614	0.109259	0.03555	0.399395	0.172879	0.445741	6.38636
